# Supplementary material for: Within-Season Changes in Land-Use Impact Pest Abundance in Smallholder African Cassava Production Systems
Source: MDPI journal article supplement (doi:10.3390/insects12030269), 2021-03-22

## Supplementary Information

**Figure S1.** Dendrogram showing the seven clusters in the landscape

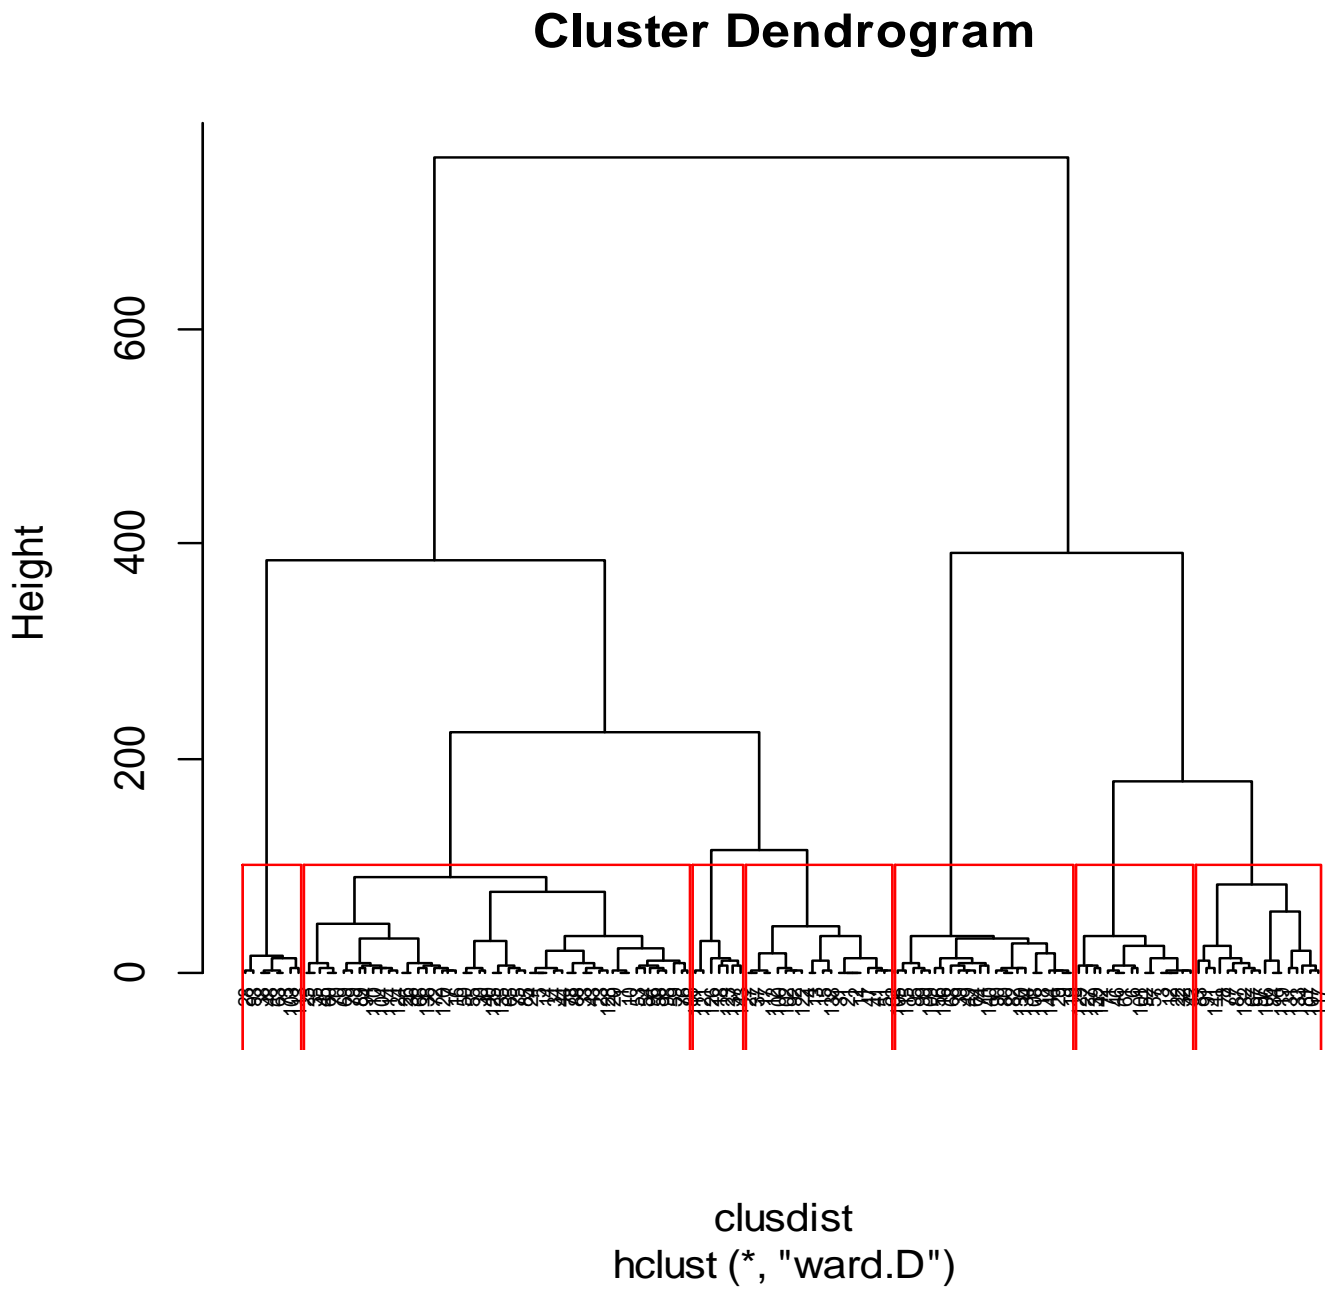

**Figure S2.** Correlation between SSA1 *Bemisia* nymphs and cassava age

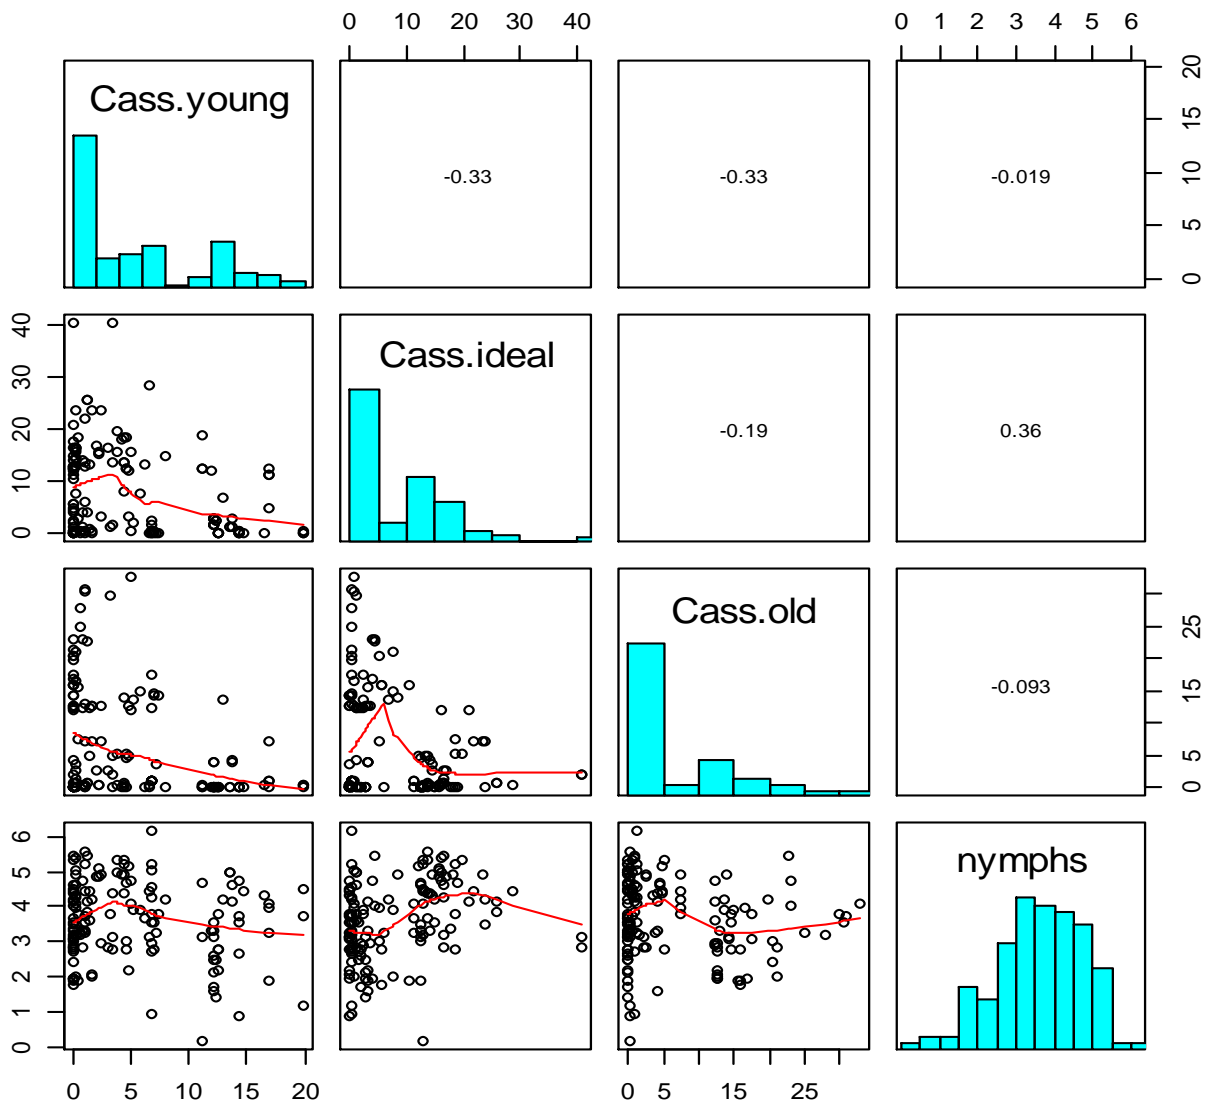

**Figure S3.** Correlation of SSA1 *Bemisia* nymphs with area of different crops in the landscape

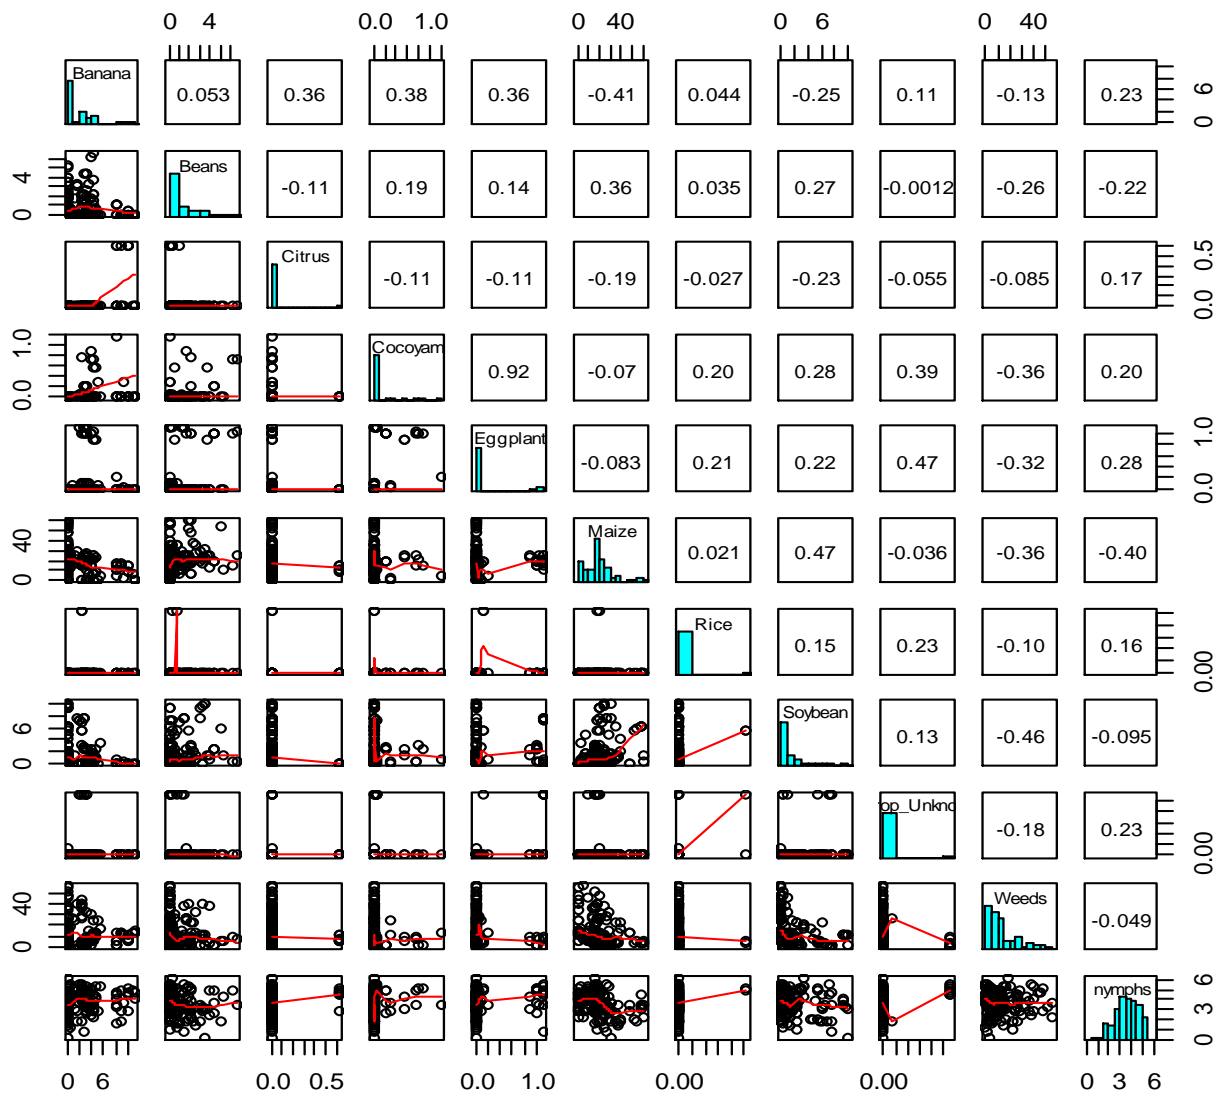

**Figure 4** Relationship between area of soybean and *Bemisia* nymph abundance in cassava.

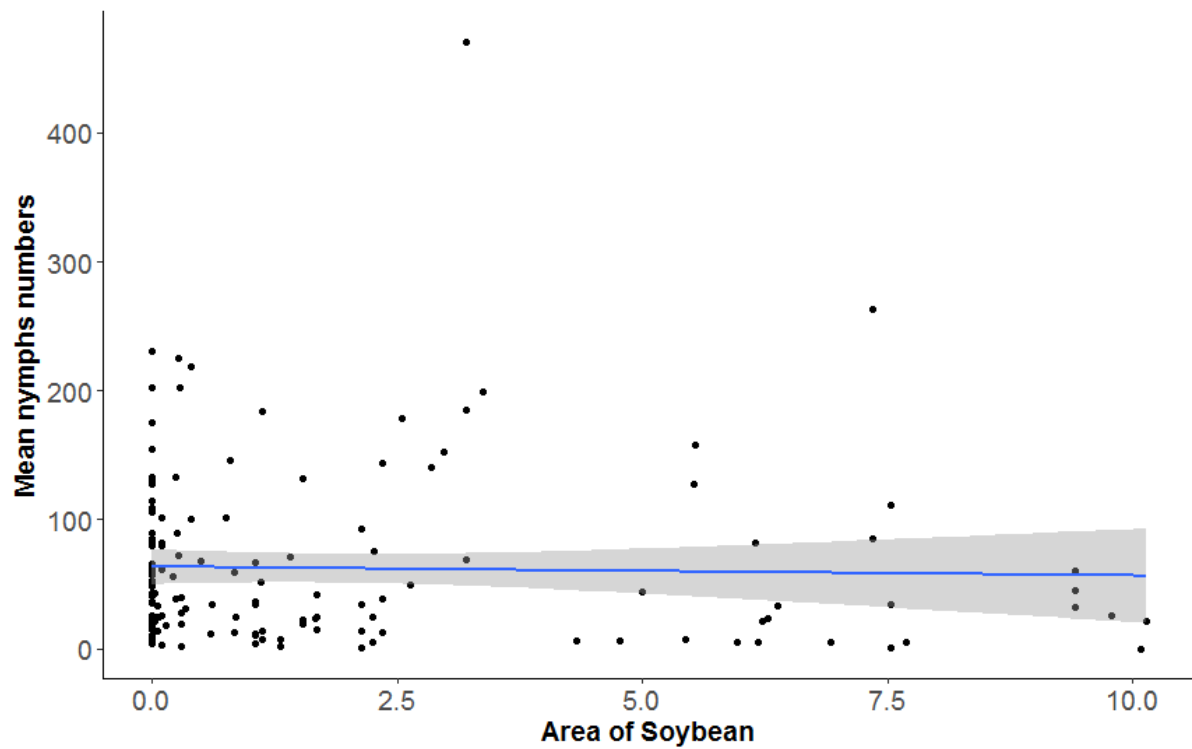

**Figure S5.** Relationship between area of maize and *Bemisia* nymph abundance in cassava

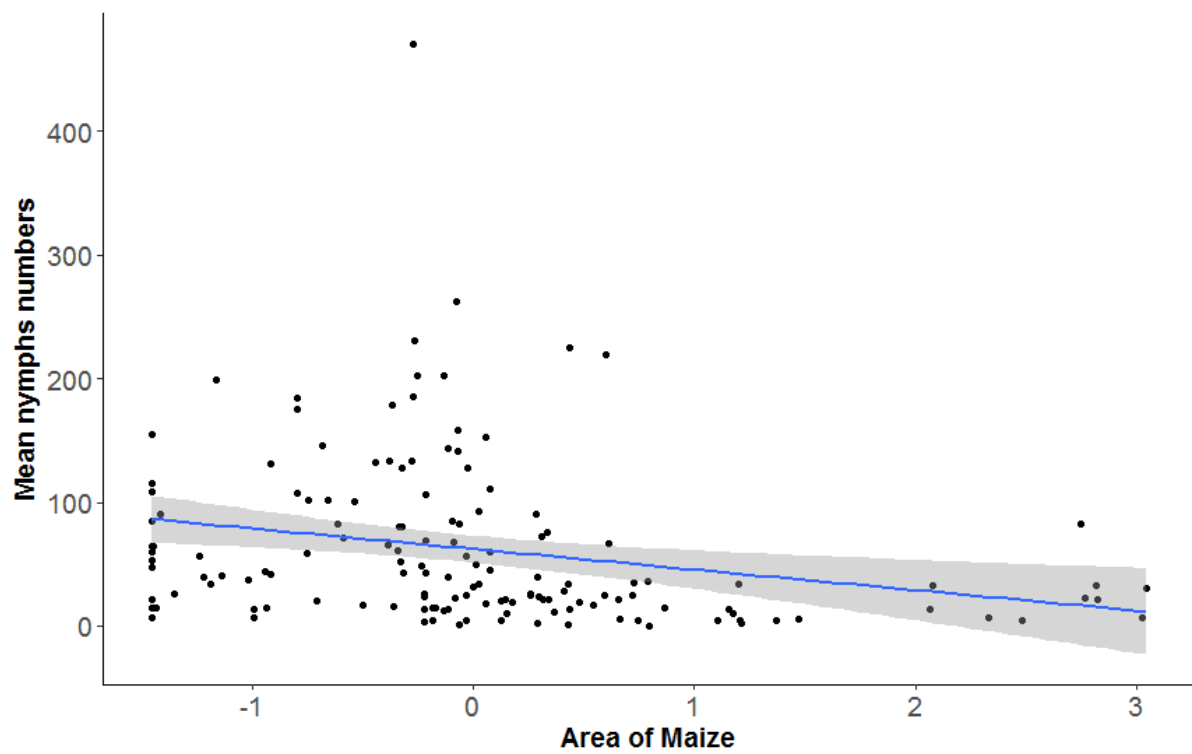

Figure S6. Relationship between area of beans and *Bemisia* nymph abundance in Cassava

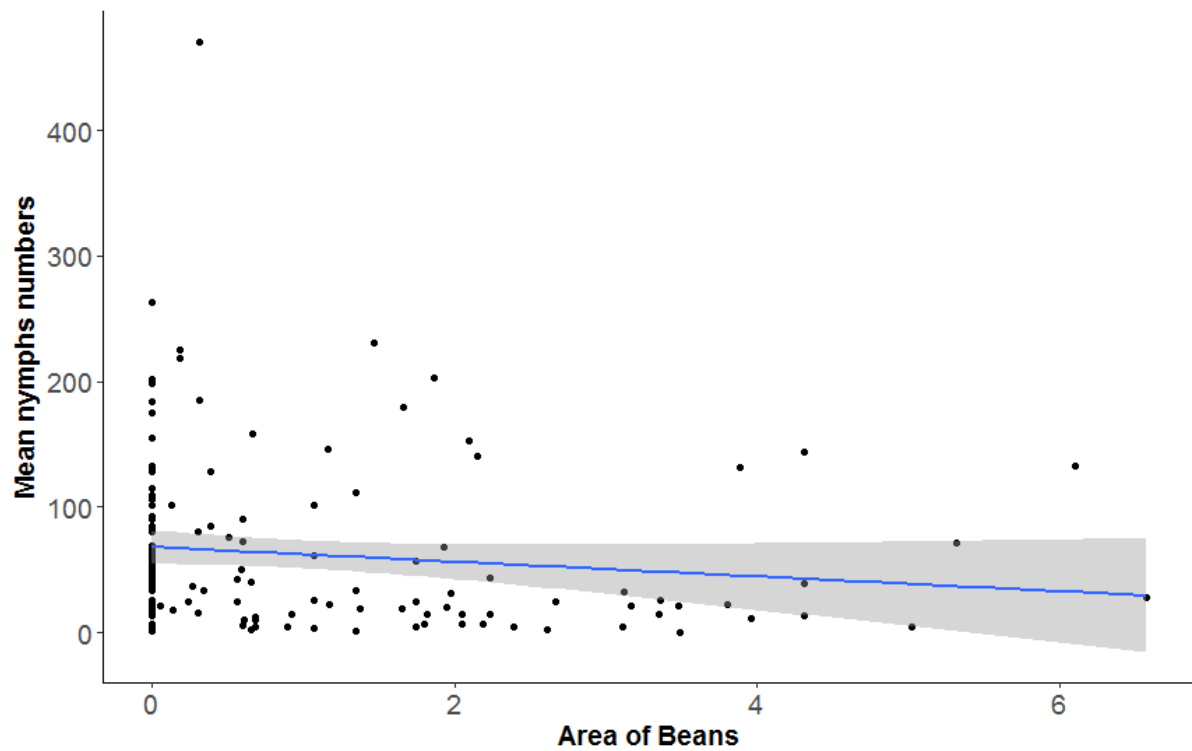

Figure S7. Relationship between area of eggplant and *Bemisia* nymph abundance in cassava

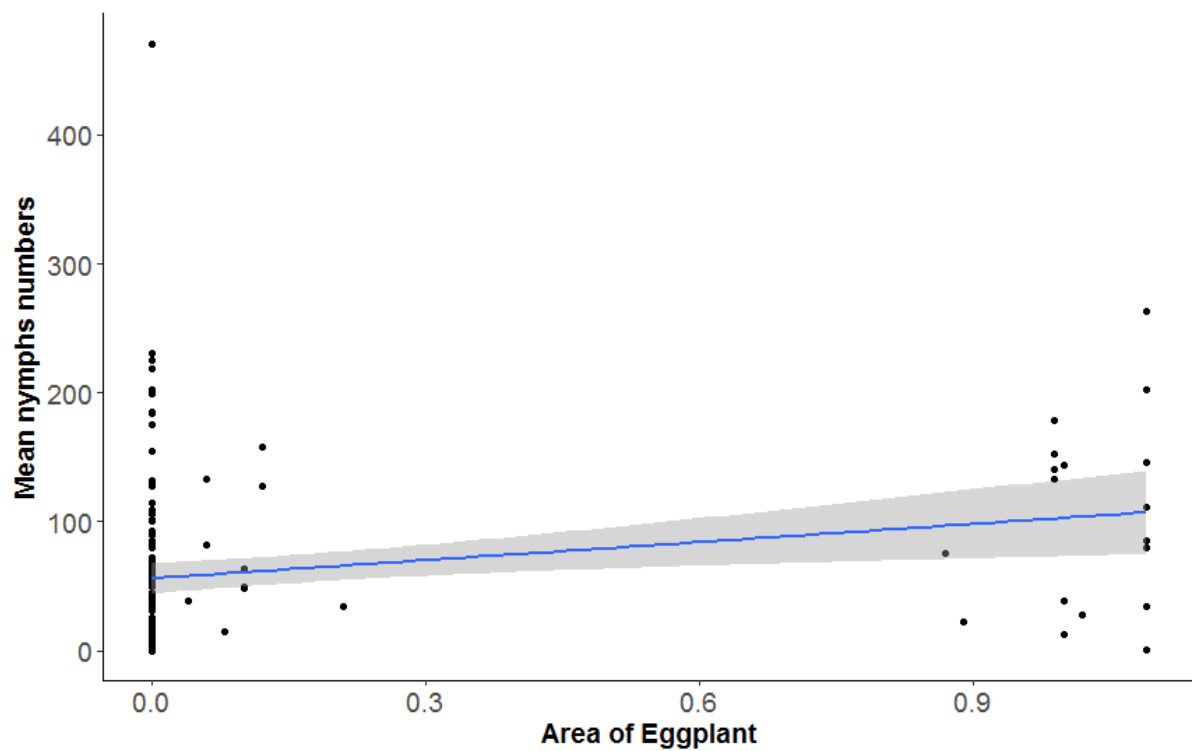

Figure S8. Relationship between area of cocoyam and *Bemisia* nymph abundance in cassava

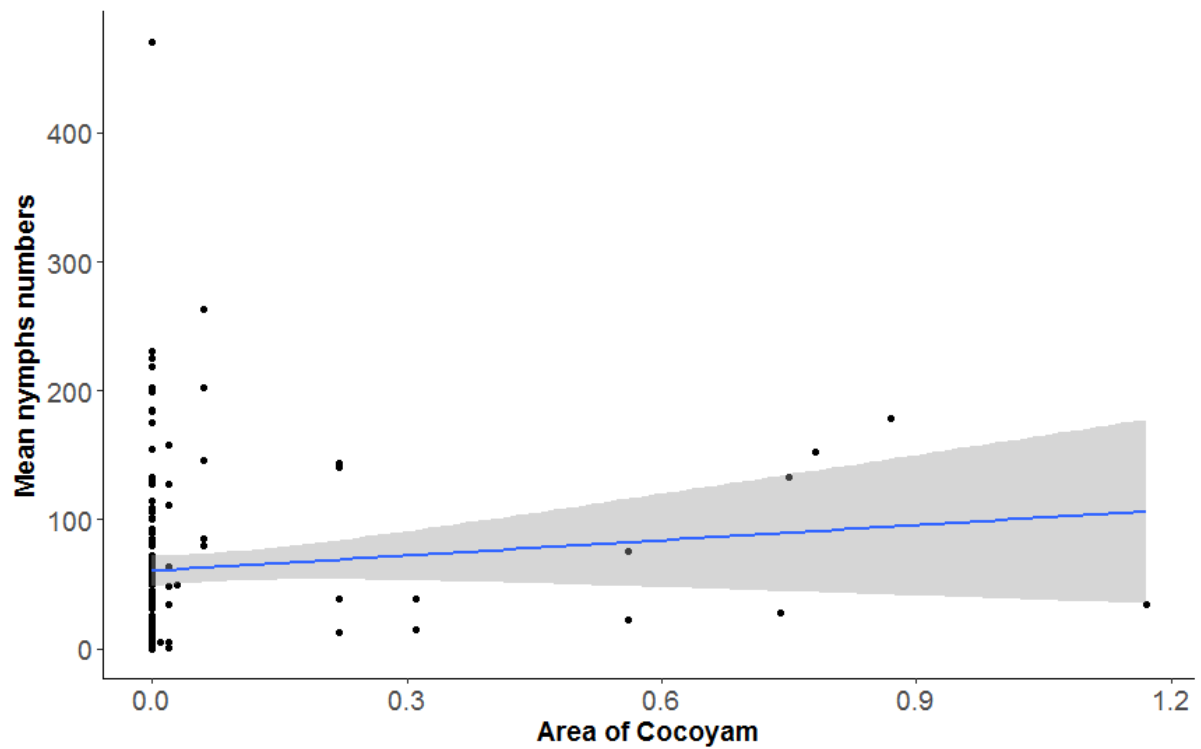

Figure S9. Relationship between area of banana and *Bemisia* nymph abundance in cassava

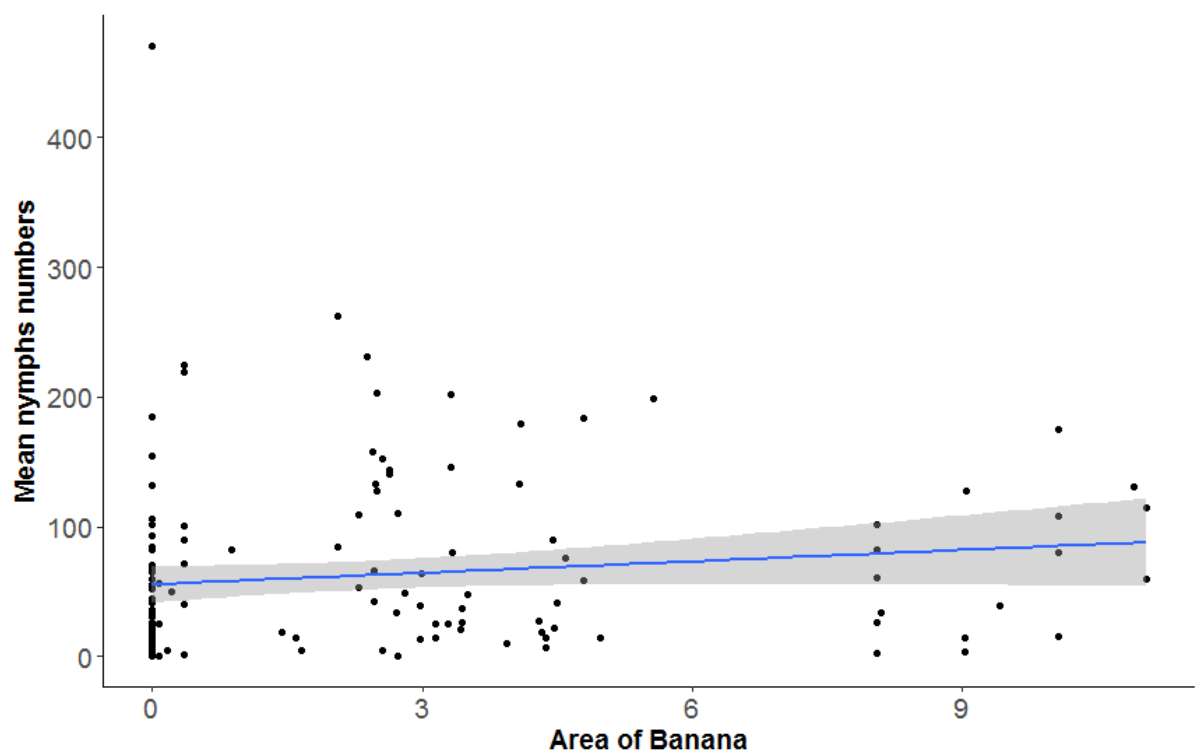

**Figure S10.** Scatterplot of percent parasitism and area of weeds in the landscape

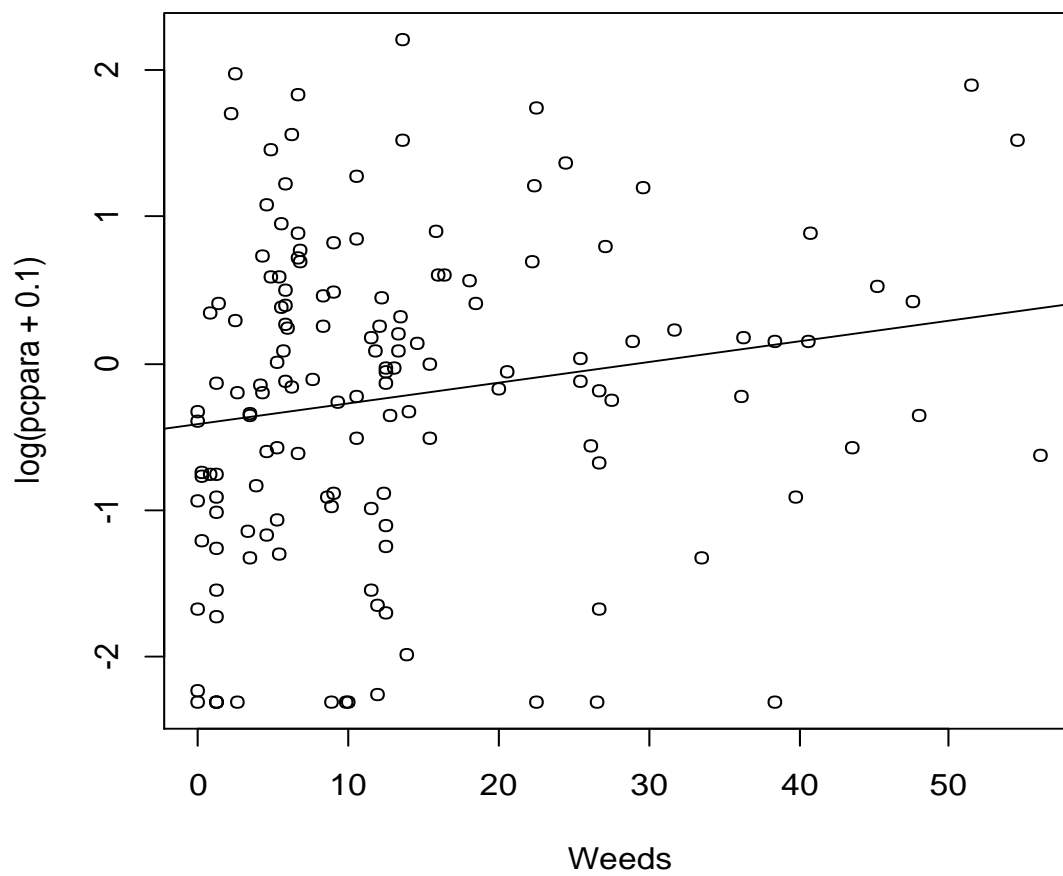

**Figure S11.** Relationship between area of cassava and non-crop patches in the landscape

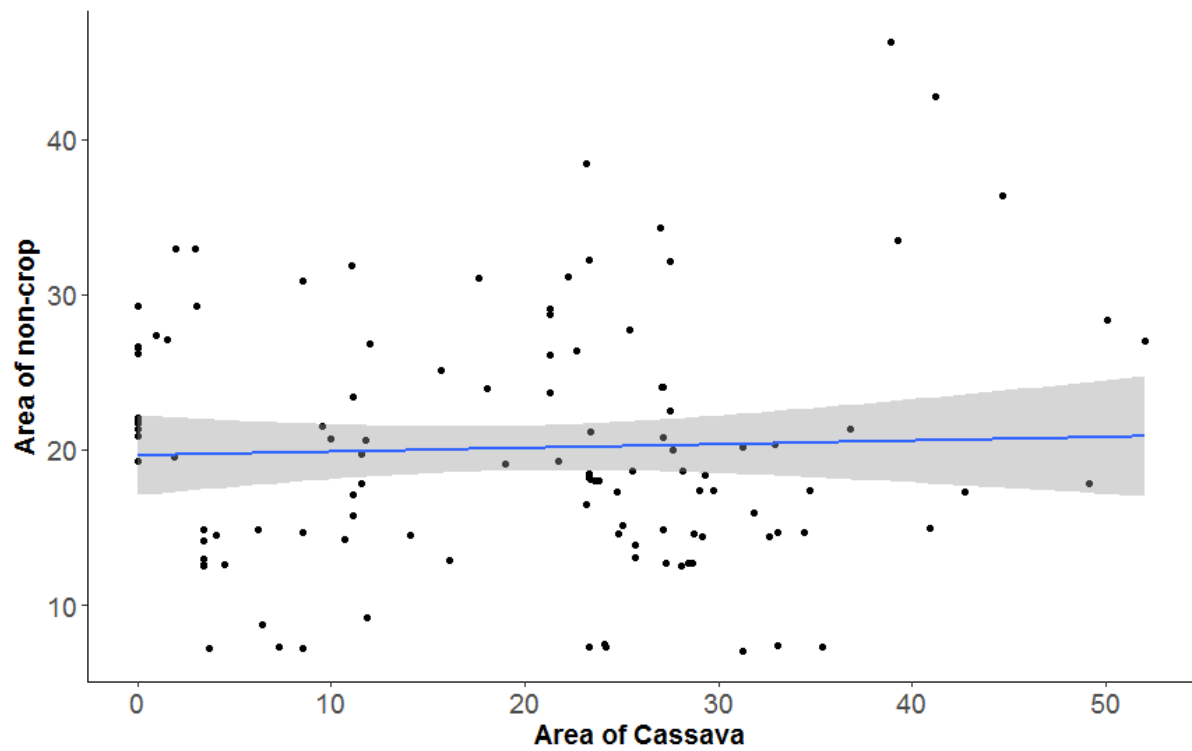

Supplement: s1 [file s1]
