# Supplementary material for: Within-Season Changes in Land-Use Impact Pest Abundance in Smallholder African Cassava Production Systems
Source: MDPI journal article supplement (doi:10.3390/insects12030269), 2021-03-22
Supplement: s1 [file s1]

Table S1. Composition of clusters by numbers of landscapes (field-IDs)

| Cluster                 | 1  | 2  | 3  | 4  | 5  | 6 | 7 |
|-------------------------|----|----|----|----|----|---|---|
| Field-ID<br>(landscape) |    |    |    |    |    |   |   |
| 1A                      | 12 | 0  | 0  | 0  | 3  | 0 | 0 |
| 1B                      | 5  | 6  | 0  | 1  | 2  | 1 | 0 |
| 1C                      | 0  | 0  | 8  | 6  | 0  | 1 | 0 |
| 1D                      | 9  | 3  | 0  | 0  | 3  | 0 | 0 |
| 1E                      | 10 | 0  | 2  | 1  | 2  | 0 | 0 |
| 2A                      | 7  | 2  | 0  | 0  | 4  | 0 | 0 |
| 2B                      | 3  | 0  | 5  | 4  | 0  | 2 | 0 |
| 2C                      | 2  | 9  | 1  | 1  | 1  | 0 | 0 |
| 2D                      | 0  | 0  | 0  | 3  | 0  | 3 | 8 |
| 2E                      | 4  | 0  | 0  | 1  | 9  | 0 | 0 |
| Totals                  | 52 | 20 | 16 | 17 | 24 | 7 | 8 |

Table S2. Composition of clusters by months after planting (Map, numbers)

| Cluster | 1  | 2  | 3  | 4  | 5  | 6 | 7 |
|---------|----|----|----|----|----|---|---|
| MAP     |    |    |    |    |    |   |   |
| 1early  | 16 | 10 | 5  | 1  | 4  | 1 | 2 |
| 2peak   | 16 | 4  | 6  | 1  | 5  | 0 | 3 |
| 3mid    | 12 | 3  | 1  | 7  | 5  | 0 | 2 |
| 4late   | 8  | 3  | 4  | 8  | 0  | 6 | 1 |
| Totals  | 52 | 20 | 16 | 17 | 24 | 7 | 8 |
